# Supplementary material
Source: PubMed Central journal article supplement (PMC3141937)
Supplement: 1101223108_pnas.201101223SI.pdf [file 1101223108_pnas.201101223SI.pdf]

# Supporting Information

Kim et al. 10.1073/pnas.1101223108

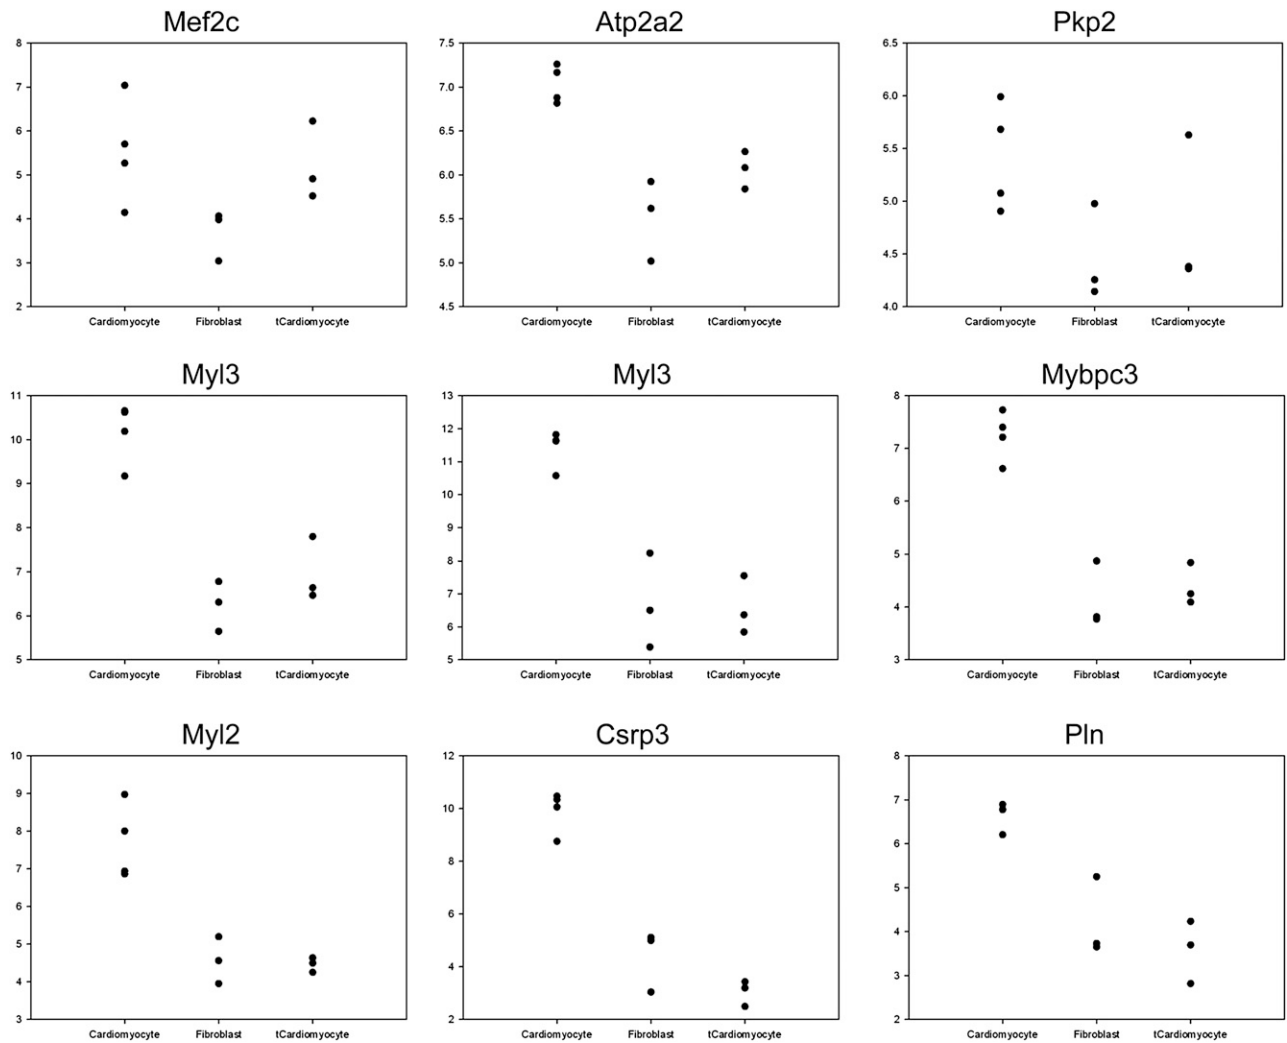

**Fig. S1.** The gene expression levels of selected individual genes display intercellular variability within a cell type. The expression levels of selected individual genes (log<sub>2</sub> scale) are plotted by cell types. Mef2c, myocyte enhancer factor 2c; Atp2a2, calcium-transporting ATPase sarcomeric reticulum type 2; Pkp2, plakophilin; Myl3, myosin, light chain 3; Mybpc3, cardiac myosin-binding protein C; Myl2, myosin, light chain 2; Csrp3, cysteine and glycine-rich protein 3; Pln, cardiac phospholamban.





**Table S3. Single-cell analyses to determine tCardiomyocytes**

| Experiment | Immunocytochemistry | Single-cell microarray | Electrophysiology | Any analysis | Age        |
|------------|---------------------|------------------------|-------------------|--------------|------------|
| 10X        |                     | +                      |                   | +            | 3 wk       |
| 10A        | -                   |                        |                   | -            |            |
| 10B        | -                   |                        |                   | -            |            |
| 10C        | -                   | +                      | -                 | +            | 4 wk       |
| 10D        |                     |                        | -                 | -            |            |
| 10E        | -                   |                        | +                 | +            | 5.5 wk     |
| 10F        | +                   |                        | +                 | +            | 3, 5, 8 wk |
| 10G        | -                   |                        |                   | -            |            |
| 10H        |                     |                        |                   |              |            |
| 10I        |                     |                        |                   |              |            |
| 10J        | -                   |                        | +                 | +            | 3 wk       |
| 10JB       |                     |                        |                   |              |            |
| 10K        |                     |                        |                   |              |            |
| 10L        |                     |                        |                   |              |            |
| 10M        |                     |                        |                   |              |            |
| 10N        | -                   |                        |                   | -            |            |
| 10O        | +                   |                        |                   | +            | 2 wk       |
| 10P        | -                   |                        |                   | -            |            |
| 10Q        |                     |                        |                   |              |            |
| 10R        |                     |                        |                   |              |            |
| 10S        |                     |                        |                   |              |            |
| 10T        |                     |                        |                   |              |            |

+, confirmed tCardiomyocyte from experiments. -, no tCardiomyocyte confirmation from experiments. Cell morphology was initially observed before taking any single-cell analysis.
